# Molecular Cytogenetic Characterization of the Dioecious *Cannabis sativa* with an XY Chromosome Sex Determination System

Mikhail G. Divashuk, Oleg S. Alexandrov, Olga V. Razumova, Ilya V. Kirov, Gennady I. Karlov\*

Centre for Molecular Biotechnology, Russian State Agrarian University – Moscow Timiryazev Agricultural Academy, Moscow, Russia

## Abstract

Hemp (*Cannabis sativa* L.) was karyotyped using by DAPI/C-banding staining to provide chromosome measurements, and by fluorescence *in situ* hybridization with probes for 45 rDNA (pTa71), 5S rDNA (pCT4.2), a subtelomeric repeat (CS-1) and the *Arabidopsis* telomere probes. The karyotype has 18 autosomes plus a sex chromosome pair (XX in female and XY in male plants). The autosomes are difficult to distinguish morphologically, but three pairs could be distinguished using the probes. The Y chromosome is larger than the autosomes, and carries a fully heterochromatic DAPI positive arm and CS-1 repeats only on the less intensely DAPI-stained, euchromatic arm. The X is the largest chromosome of all, and carries CS-1 subtelomeric repeats on both arms. The meiotic configuration of the sex bivalent locates a pseudoautosomal region of the Y chromosome at the end of the euchromatic CS-1-carrying arm. Our molecular cytogenetic study of the *C. sativa* sex chromosomes is a starting point for helping to make *C. sativa* a promising model to study sex chromosome evolution.

**Citation:** Divashuk MG, Alexandrov OS, Razumova OV, Kirov IV, Karlov GI (2014) Molecular Cytogenetic Characterization of the Dioecious *Cannabis sativa* with an XY Chromosome Sex Determination System. PLoS ONE 9(1): e85118. doi:10.1371/journal.pone.0085118

**Editor:** Gabriel A.B. Marais, CNRS/University Lyon 1, France

**Received:** May 14, 2013; **Accepted:** December 2, 2013; **Published:** January 21, 2014

**Copyright:** © 2014 Divashuk et al. This is an open-access article distributed under the terms of the Creative Commons Attribution License, which permits unrestricted use, distribution, and reproduction in any medium, provided the original author and source are credited.

**Funding:** This work was supported by Russian Ministry of Science and Education (No. 8588) and Russian Foundation of Basic Research No.13-04-01804 and No.13-04-02116. The funders had no role in study design, data collection and analysis, decision to publish, or preparation of the manuscript.

**Competing Interests:** The authors have declared that no competing interests exist.

\* E-mail: karlovg@gmail.com

## Introduction

Dioecy occurs in approximately 7% of flowering plant species [1], [2], among which only a small number of species have cytogenetic and/or molecular evidence for sex chromosomes. In contrast to animals, where dioecism is often accompanied by sex chromosome dimorphism, cytogenetically distinguishable sex chromosomes have been reported only in 19 species, in 16 angiosperm families [2]. Sex chromosomes are thought to have evolved independently in plants many times, suggesting a recent origin of sex chromosome dimorphism in many plants [2], [3], [4], [5], [6], [7], [8], [9].

Few plants with sex chromosomes have yet been studied with molecular genetic tools. Cytogenetic landmarks for the sex chromosomes and fully sex-linked DNA markers have been established in species of *Rumex* [10], [11], [12], [13], [14], *Silene* [15], [16], [17], [18], [19], *Humulus* [20], [21], [22], [23], [24], [25], [26], and *Coccoloba* (Cucurbitaceae) [27], but sex-linked genes have so far been identified in dioecious *Silene* species (mainly *S. latifolia*) [28], [29], [30], [31], [32], [33] and in papaya (*Carica papaya*) [34].

The small family Cannabaceae *sensu lato* (with 11 genera) includes the Cannabaceae *sensu stricto*, whose three species are all dioecious, and is a member of the urticalean rosids, whose other members include Urticaceae *sensu lato* (with both monoecious and dioecious species) and Moraceae (with a high proportion of dioecious species). Hemp (*Cannabis sativa*,  $2n=20$ ) and the common hop (*Humulus lupulus*,  $2n=20$ ) have XX/XY chromosome system, while Japanese hop (*H. japonicus*,  $2n=16$  for female

and 17 for male) has an XX/XY1Y2 system. *C. sativa* has a male-determining Y [2], [35], but, in *H. lupulus* and *H. japonicus*, sex is determined by the X to autosome ratio, although the Y chromosome is essential for normal pollen development in *H. lupulus* [36]. *C. sativa* has a smaller genome size (0.84–0.91 pg [37], [38]) than those of the two *Humulus* species (1.7 pg for *H. japonicus* [39], [40], and 2.90 pg for *H. lupulus* [39]). The karyotypes of *H. lupulus* and *H. japonicus* have been well studied. In contrast to most plants with sex chromosomes, the *H. lupulus* Y chromosome is the smallest in the karyotype [21], while in *H. japonicus* the Y1 and Y2 chromosomes are the largest in the karyotype [23].

Many male-specific DNA markers have been identified in *C. sativa*, allowing male and female plants to be identified in early developmental stages [41], [42]. However, despite recent progress in *C. sativa* genome sequencing and genomics [43], we know little about its sex chromosome structure apart from the basic karyotype information outlined above. The species' estimated haploid genome sizes are 818 Mb for female plants and 843 Mb for males, indicating that the Y chromosome is larger than the X [37], although this difference is not usually detectable by microscopic techniques [37], Yamada, 1943, cited by [44], [45], and very precise measurements are needed to identify the Y chromosome. Karyotype analysis of DAPI stained chromosomes suggested that the X chromosome is submetacentric and the Y chromosome is subtelocentric, with a satellite at the terminus of its short arm, but Chattopadhyay (1989) [cited by 46], observed no heteromorphic bivalent during meiosis, suggesting that the chromosomes do not show strong heteropycnosis or size differences. However, it was shown that one arm of chromosome Y was heterochromatic and

that its terminal region contained 100 to 200 copies of a LINE-like retrotransposon repeated sequence [47].

Modern cytogenetic methods have not previously been applied to *C. sativa* for karyotype analysis. Here, we characterize the karyotype of male and female *C. sativa* L. using DAPI banding and FISH using 5S and 45S rDNA probes, as well as probes for telomeric and subtelomeric repeats on mitotic and meiotic cell preparations. At present, no fully assembled Y chromosome from plants is available, other than the small Y region in papaya (*Carica papaya* L.) [48]. The likely small size of the *C. sativa* genome (which is estimated to be about 825 Mbp) and the completion of the draft genome sequence of this species could enable this to become possible. Our results providing basic molecular cytogenetic data on the structure of the *C. sativa* genome, including the sex chromosomes, could provide a starting point for genome assembly.

## Materials and Methods

### Plant material

The following male and female *Cannabis sativa* plants were used in these experiments. For the study of mitosis, cv “Zenitsa” seedlings (P.P. Lukyanenko Krasnodar Research and the Development Institute of Agriculture, Krasnodar, Russia) were harvested. To study meiosis, young buds from the “T-80” line were provided by Dr S. Dolgov (Branch of M.M. Shemyakin and Yu. A. Ovchinnikov Institute of Bioorganic Chemistry of the RAS, Pushchino, Moscow Region, Russia).

### Mitotic chromosome preparation

Actively growing root tips approximately 1.5 – 2.0 cm long were harvested separately from young hemp seedlings and immediately pre-treated with a 2 mM aqueous solution of 8-hydroxyquinoline for 2 h at room temperature (RT) and then for 2 h at 4°C in the dark. A 3:1 ethanol/glacial acetic acid (v/v) mix was used for fixation. Meristems 2 mm long were cut from fixed root tips and digested in a 10 µl enzyme solution (0.5% cellulase Onozuka R-10 (Serva, Germany) and 0.5% pectolyase Y-23 (Seishin Corp., Japan)) in 10 mM citrate buffer (pH = 4.9) for 1.5 h at +37°C. Suspended cells were used for chromosome preparation as described by Henegariu [49] and Kato et al. [50].

### Meiotic chromosome preparation

Young buds were harvested for meiotic chromosome preparation. Screening of the meiosis stages was performed in one of five anthers by chromosome preparation with acetocarmine staining. Anthers at diakinesis were fixed in a 3:1 ethanol and glacial acetic acid (v/v) mix. Prior to chromosome preparation, the anthers were washed in 0.5 ml of distilled water for 1 h. Washed anthers were digested in an enzyme solution (0.9% cellulase Onozuka R-10 (Serva, Germany), 0.3% pectolyase Y-23 (Seishin Corp., Japan), and 0.9% cytohellicase from *Helix pomatia* C8274 (Sigma, USA)) in 10 mM citrate buffer, pH = 4.9. Anthers were crushed in 60% acetic acid. Then, a 3:1 mixture of ethanol and glacial acetic acid (v/v) was added to the slide around and in the center of the drop. Each slide was washed with 96% ethanol and dried.

### DNA isolation

DNA isolation was performed as described by Doyle and Doyle [51] with some modifications. The extracting buffer contained 100 mM Tris-HCl (pH = 8.0), 20 mM EDTA (pH = 8.0), 2 M NaCl, 1.5% CTAB, 1.5% PVP and 0.2% β-mercaptoethanol. A 15 mM ammonium acetate solution in 75% ethanol was used for DNA washing.

### PCR test for sex identification of plants

As chromosome preparations were performed on young seedlings, sex identification of plants was required. A PCR-test with the molecular markers MADC2 and SCAR332 was used for sex identification, as described by Mandolino et al. [41] and Torjek et al. [42]. The modified program for the MADC2 primers consisted in 94°C for 5 min, followed by 35 cycles of 94°C for 30 s, 60°C for 1 min, and 72°C for 1 min, and then 72°C for 5 min. The modified program for the SCAR332 primers consisted in 94°C for 2 min, followed by 35 cycles of 94°C for 10 s, 62.5°C for 30 s, 72°C for 1 min, and then 72°C for 2 min.

### BLAST analysis

A search for the hemp subtelomeric repeat was performed with a BLAST search (<http://blast.ncbi.nlm.nih.gov>) using the hop subtelomeric repeat sequence (GU831574) to probe the *Cannabis sativa* whole-genome shotgun contigs. In the search results, a contig (AGQN01004814) with one repeat of low homology to the hop subtelomeric tandem repeat was found. Nineteen tandemly repeated units about 375 bp in size from this contig were found using the GenDoc software (<http://gendiapo.sourceforge.net>) and were subsequently used for primer design. The primers (CS-1f 3'-GGTACCACCTATGAGAAATGTGAGA-5' and CS-1r 3'-CCTTTGTGAAATGTGCCCC-5') used to amplify the detected repeat units were designed using PRIMER3 v.0.4.0 (<http://frodo.wi.mit.edu>). The PCR products from the CS-1 reaction were purified and cloned into the pGEM®-T Easy Vector A1360 (Promega, USA) in *E. coli* cells. Plasmids with inserts were isolated from cells using the GeneJET™ Plasmid Miniprep Kit (Fermentas, Lithuania). The nucleotide sequences of the inserts were determined on an ABI3130XL instrument (Applied Biosystems, Inc., USA) after sequencing reactions were performed with a Big Dye Terminator v 1.1. Cycle Sequencing Kit (Applied Biosystems, Inc., USA).

### DNA probes and Fluorescent *in situ* hybridization (FISH)

The following probes were used: pTa71 (18S-28S rDNA) [52], pCT4.2 (5S rDNA) [53], the *Arabidopsis*-type telomere probe (5'-CCCTAAA-3')<sub>3</sub> synthesized with a TAMRA label (ZAO “Syn-tol”, Moscow, Russia) and the CS-1 probe (*C. sativa* subtelomeric repeat (JX402748)). All DNA probes were labeled by nick translation and PCR according to the manufacturer’s instructions (Boehringer, Germany) with biotin-16-dUTP (CS-1, pCT4.2) or digoxigenin-11-dUTP (pTa71). FISH experiments were performed as described by Karlov et al. [21]. The chromosomes were counterstained with 1 mg/ml DAPI and mounted in Vectashild (Vector laboratories, UK). An AxioImager M1 fluorescent microscope (Zeiss) was used to observe chromosome preparations. The metaphase plates with fluorescent signals were photographed with a monochrome AxioCam MRm CCD camera and visualized using Axiovision software (Zeiss). Metaphase chromosomes were classified according to Levan et al. [54] based on their arm ratio and FISH hybridization pattern. In each experiment, at least 20 mitotic metaphase plates from each of the 11 male and 8 female plants were analyzed.

## Results

### Karyotype

The metaphase cells in both female and male root tips showed many polyploid cells. The chromosomes are small, and varied from 2.6 to 3.8 µm, and could not all be distinguished by their length and centromere position. The autosome complement consisted of 8 pairs of metacentric (m) chromosomes and one

pair of satellite (SAT) NOR (nucleolus organizer region) - bearing submetacentric chromosomes (sm), ordered in pairs 1–9 according to their length and arm ratio (Fig. 1). The haploid karyotype formula of *C. sativa*, describing number of each chromosome types, was  $8m + 1sm$  (SAT) +  $Xm/Ym$  for male and  $8m + 1sm$  (SAT) +  $Xm$  for female plants.

#### DAPI

Due to the small size of these chromosomes, it was difficult to obtain high-quality DAPI banding. DAPI-positive bands were seen at the ends of all chromosomes, but not on all arms (Fig. 1a-c). Weak DAPI-positive bands were also detected near the

centromere of one pair of NOR-bearing chromosomes and one pair of metacentric chromosomes. In the prometaphase chromosomes, pericentromeric heterochromatin and proximal euchromatin was also visible (Fig. 1b). In male plants, one of the largest chromosomes showed brighter DAPI staining on one heterochromatic arm relative to the other euchromatic arm of the chromosome (Fig. 1a, b). This chromosome was likely the Y chromosome. The second largest chromosome without homologous DAPI positive bands on both subtelomeres was probably the X chromosome. A pair of these chromosomes was detected in female plants.

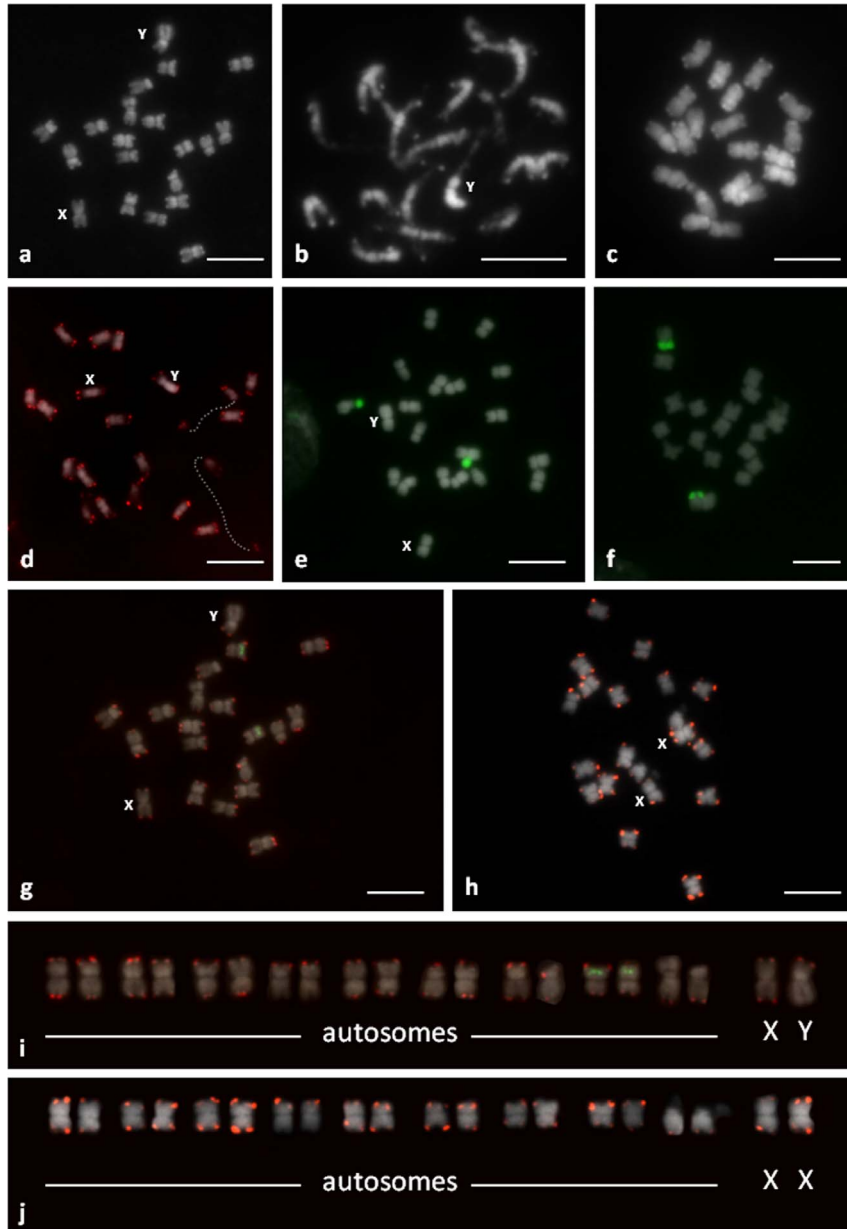

**Figure 1. Chromosomes of *C. sativa*: C-banding/DAPI, male metaphase (a), male prometaphase (b) and female metaphase (c).** Distribution of *Arabidopsis*-type (5'-CCCTAAA-3') telomeric sequences (small red dots located at the end of the chromosomes) (d). FISH with 45S rDNA (green signals) on male (e) and female (f) metaphase chromosomes. Bicolor FISH to male metaphase (g) with CS-1 subtelomeric repeat (red) and 5S rDNA probe (green). FISH to female metaphase (h) with CS-1 subtelomeric repeat (red). The karyotypes of male (i) and female (j) plants. Bar = 5  $\mu$ m.

doi:10.1371/journal.pone.0085118.g001

## FISH

*C. sativa* chromosomes were further analyzed by FISH using repetitive DNA probes. Arabidopsis-type telomeric repeats (5'-CCCTAAA-3') were observed on the termini of all *C. sativa* chromosomes (Fig. 1d), and no interstitially located signals from telomeric sequences were observed in the material analyzed. The subtelomeric repeat probe (CS-1) showed clear signals in the subtelomeric regions of both arms of all chromosomes in male and female plants, except for the heterochromatic arm of chromosome Y, the NOR-bearing arm of autosomes (see below) and the long arm of some other autosome pairs (Fig. 1g, h). The DAPI positive subtelomeric bands colocalized with CS-1.

FISH with the pTa71 (18S-5,8S-25S rDNA) probe revealed a signal on the NOR-bearing arm of the single chromosome pair of male and female plants (Fig. 1e, f). The size of the signal differed between homologous chromosomes. The pCT4.2 (5S rDNA) probe detected the pericentromeric position of another autosome pair, which carried the CS-1 subtelomeric repeat on both chromosome arms (Fig. 1g). Based on these data, the karyotype of male and female plants was constructed (Fig. 1i, j).

The Y chromosome can be distinguished from all the autosomes by its larger size, the presence of a fully heterochromatic arm and the presence of CS-1 only on the euchromatic chromosome arm (stained less intensely with DAPI, Fig. 2). The largest chromosome was assumed to be the X chromosome, and carries CS-1 subtelomeric repeats on both arms. No morphological or significant size differences were detected between the X chromosome and the autosomes (Fig. 2), and identification of the X on metaphase plates was problematic. The X chromosome was not clearly differentiated from the autosomes because they have a similar size (table 1) and the presence of CS-1 at terminal positions on both arms (Fig. 2). Very precise measurements are needed to identify the X chromosome. Three of the nine pairs of autosomes could be distinguished individually using pTa71 (18S-5, 8S-25S rDNA), pCT4.2 (5S rDNA) and CS-1 probes.

## Meiotic observation

The meiotic chromosome complement of *C. sativa* consisted of ten similarly sized bivalents, and FISH analysis with the CS-1 probe in the diakinesis stage confirmed the mitotic chromosomal observations. The XY open bivalent of male plants had signals in the same positions as in mitotic chromosomes (Fig. 3a, b). The telomeric chiasma of the open sex bivalent was found to occur between the Y chromosome euchromatic arm carrying the CS-1 subtelomeric repeat and one arm of the X chromosome, which possessed CS-1 on both arms. In all meiotic chromosome complements studied, similar chiasmata were observed on the sex chromosomes pair. We therefore conclude that the pseudoautosomal region (PAR) of the Y chromosome consists of the distal parts of the euchromatic arm (Fig. 3c).

**Table 1.** Size of sex chromosomes compared to the largest autosome.

| Chromosome           | Relative chromosome length, % |
|----------------------|-------------------------------|
| Y                    | 6.5±0.18                      |
| X                    | 6.1±0.19                      |
| The largest autosome | 5.6±0.12                      |

doi:10.1371/journal.pone.0085118.t001

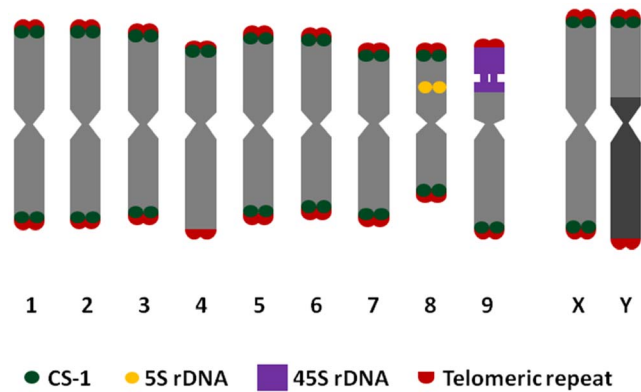

**Figure 2.** Idiogram of haploid chromosome complement of *C. sativa*, including Arabidopsis-type telomeric repeat, CS-1 subtelomeric repeat, 45S rDNA and 5S rDNA sites.

doi:10.1371/journal.pone.0085118.g002

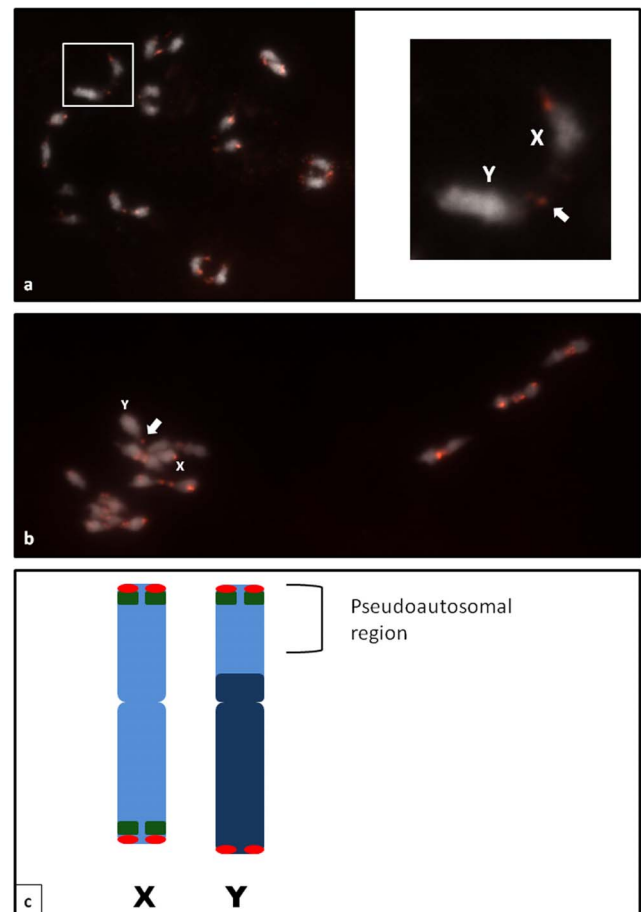

**Figure 3.** The meiotic chromosomes of *C. sativa* at diakinesis (a) and metaphase I (b). The chiasma between the sex chromosomes can clearly be seen and indicated by arrows. c Idiogram of the *C. sativa* XY chromosomes with the hybridization sites of CS-1 (green) and the Arabidopsis-type telomeric repeat (red). The pseudoautosomal region is indicated by brackets.

doi:10.1371/journal.pone.0085118.g003

## Chromosome distribution of rDNA, subtelomeric repeat and PAR in Cannabaceae

In order to compare and analyze the evolutionary relationships among *Humulus lupulus*, *H. japonicus* and *Cannabis sativa* the PAR localization on sex chromosomes, chromosomal distribution of 5S and 45S rDNA, as well as subtelomeric species specific DNA repeats based on data obtained in this study and presented in previous papers [21], [23], [24], [26], [55] are summarized and displayed schematically in Figure 4. The number of 5S and 45S rDNA loci differs among these species. The main difference in subtelomeric repeat location was detected on sex chromosomes, especially in *H. lupulus* where this repeat was hybridized near centromere position on X chromosome. The location of PAR was in agreement with subtelomeric repeat location on X and Y chromosomes.

## Discussion

FISH performed with 5S and 45S rDNAs probes differentiated two pairs of *C. sativa* autosomes from the other chromosomes and from each other. In addition to the considerably smaller nuclear DNA amount than in the closest relatives of this species (suggesting extensive DNA/chromatin elimination or accumulation of repetitive sequence), and in chromosome counts (see above), the karyotypes of the perennial *H. lupulus* and annual *H. japonicus* also differ (Fig.4). A first difference is the location of rDNA. In *H. lupulus*, two chromosomes carry 5S rDNA loci and one carries the 45S rDNA locus, whereas in *H. japonicus* one chromosome carries the 5S rDNA and two carry the 45S rDNA loci [21], [23], [55]. However, the structural organization of the nuclear ribosomal RNA genes of all three species is similar [56]. The differences in the number of rDNA sites and chromosome counts suggest that chromosome translocations must have occurred.

Under the most widely accepted theory of sex chromosome evolution, the X and Y were derived from a pair of autosomes that became differentiated after suppressed recombination evolved around the locus controlling sex determination [2], [4], [7], [58], [59]. Among the events and processes that may have been involved in suppressing recombination between the Y and X chromosomes are chromosome rearrangements [49], [59]. The

distribution of signals using probes for species-specific subtelomeric repeats in *H. lupulus* (HSR-1) [24], *H. japonicus* (HJSR) [26] and *C. sativa* (CS-1, this study) showed the following evidence suggesting chromosome rearrangements, particularly in the sex chromosomes. The *C. sativa* Y chromosome has CS-1 repeats at the end of only one chromosome arm, and this is similar to HSR-1 in *H. lupulus*. The X chromosomes of both *C. sativa* and *H. lupulus* have two sites with subtelomeric repeats, but in *H. lupulus* the second site is placed interstitially near the centromere of the chromosome. In *H. japonicus*, the HJSR located only on one X chromosome arm, but the Y1 chromosome has repeats on both arms, while Y2 does not have subtelomeric repeats. The orientation of the pseudoautosomal regions on the X and Y (or Y1 and Y2) chromosomes indicates an important role of subtelomeric repeats in sex chromosome genesis. We found Arabidopsis-type telomeric repeats at the termini of all hemp chromosomes, as in *H. japonicus* and *H. lupulus* [24], [26]. Because we found no interstitial telomeric FISH signals in *C. sativa*, no long telomeric sequence can have been involved in translocations or inversions in hemp.

The *C. sativa* Y chromosome arm that does not pair with the X chromosome is heterochromatic and is visibly more condensed compared with pairing region. The Y1 and Y2 chromosomes of *H. japonicus* are also heterochromatic and showed distinctly stronger DAPI fluorescence [23]. In *S. latifolia*, the non-pairing region of the Y chromosome appears relatively condensed [8], possibly due to high level of DNA methylation or/and the accumulation of repetitive sequences such as retrotransposons. Accumulation of repetitive sequences on Y chromosomes has been detected in studies of species of *Rumex acetosa* [11], *Silene latifolia* [18] and *C. sativa* [47]. The DAPI positive staining of the Y chromosome arm in this study suggests that it may be enriched in repeated sequences.

In *H. lupulus* the Y is the smallest chromosome, while in *H. japonicus* the Y1 and Y2 are the largest chromosomes [21], [23], [24], [26]. Our results show that the Y is larger than the autosomes and the X chromosome in *C. sativa*. The small size of *H. lupulus* Y probably due to that it has undergone deletion of parts that are present in the Ys of *H. japonicus* and *C. sativa*. The polymorphic sex chromosome system in *H. japonicus* could have arisen by the translocation of an autosome to the X chromosome and the

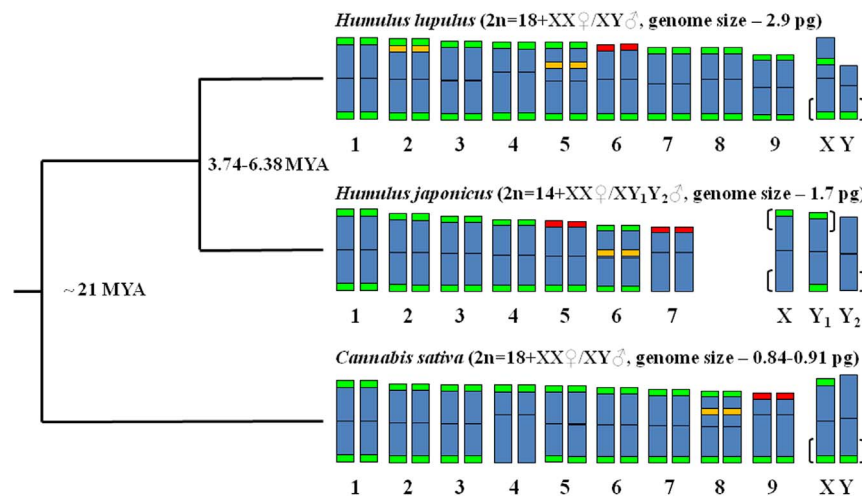

**Figure 4. Simplified phylogeny of Cannabaceae genus included in idiograms.** The phylogeny is according to the reference of [59]. Idiograms created based on data obtained in [21], [23], [24], [26], [55] and in this study. 5S rDNA: green signals; 45S rDNA: red signals; species-specific subtelomeric repeats (HSR-1 for *H. lupulus*, HJSR for *H. japonicus* and CS-1 for *C. sativa*): green signal. The position of pseudoautosomal region on sex chromosomes is indicated by brackets. Time of divergence estimated in [60], [61], [62]. doi:10.1371/journal.pone.0085118.g004

homologous (nontranslocated) autosome becomes a second Y chromosome [23]. The limited data available so far reveal no relationship between the ages of sex chromosomes and the extent of Y/autosome or X/Y divergence and also suggest that transposon accumulation and chromosome rearrangements occur idiosyncratically [27]. All these observations suggest that the paths of plant sex chromosomes evolution are not uniform. It is therefore of interest to test whether the *C. sativa* X and Y are homologous with the X and/or Y of the related species. However, this is not yet possible, as none of our probes are specific for a single-copy sequence and it is a task for the future research.

## References

- Dellaporta SL, Calderon-Urrea A (1993) Sex determination in flowering plants. *Plant Cell* 5:1241–1251.
- Ming R, Bendahmane A, Renner SS (2011) Sex chromosomes in land plants. *Annu Rev Plant Biol* 62:485–514.
- Charlesworth D (2002) Plant sex determination and sex chromosomes. *Heredity* 88:94–101.
- Charlesworth D (2013) Plant sex chromosome evolution. *J Exp Bot* 64:405–420.
- Vyskot B, Hobza R (2004) Gender in plants: sex chromosomes are emerging from the fog. *Trends Genet* 20:432–438.
- Ming R, Wang J, Moore PH, Paterson AH (2007) Sex chromosomes in flowering plants. *Am J Bot* 94:141–150.
- Jamilena M, Mariotti B, Manzano S (2008) Plant sex chromosomes: molecular structure and function. *Cytogenet Genome Res* 120:255–264.
- Armstrong SJ, Filatov DA (2008) A cytogenetic view of sex chromosome evolution in plants. *Cytogenet Genome Res* 120:241–246.
- Janousek B, Mrackova M (2010) Sex chromosomes and sex determination pathway dynamics in plant and animal models. *Biol J Linn Soc* 100:737–752.
- Mariotti B, Navajas-Pérez R, Lozano R, Parker JS, de la Herrán R, et al. (2006) Cloning and characterization of dispersed repetitive DNA derived from microdissected sex chromosomes of *Rumex acetosa*. *Genome* 49:114–121.
- Mariotti B, Manzano S, Kejnovský E, Vyskot B, Jamilena M (2009) Accumulation of Y-specific satellite DNAs during the evolution of *Rumex acetosa* sex chromosomes. *Mol Genet Genomics* 281:249–259.
- Cuñado N, Navajas-Pérez R, de la Herrán R, Rejón CR, Rejón MR, et al. (2007) The evolution of sex chromosomes in the genus *Rumex* (*Polygonaceae*): identification of a new species with heteromorphic sex chromosomes. *Chromosome Res* 15:825–833.
- Navajas-Pérez R, Schwarzacher T, Rejón MR, Garrido-Ramos MA (2009) Molecular cytogenetic characterization of *Rumex papillaris*, a dioecious plant with an XX/XY1Y2 sex chromosome system. *Genetica* 135:87–93.
- Grabowska-Joachimiak A, Kwolek D, Kula A, Marciniuk P (2012) Fluorescent banding pattern and species-specific DNA marker in *Rumex thysiflorus* Fingerh. *Cytogenet Genome Res* 137:70–77.
- Lengerova M, Kejnovsky E, Hobza R, Macas J, Grant SR, et al. (2004) Multicolor FISH mapping of the dioecious model plant, *Silene latifolia*. *Theor Appl Genet* 108:1193–1199.
- Hobza R, Lengerova M, Svoboda J, Kubekova H, Kejnovsky E, et al. (2006) An accumulation of tandem DNA repeats on the Y chromosome in *Silene latifolia* during early stages of sex chromosome evolution. *Chromosoma* 115:376–382.
- Cermak T, Kubat Z, Hobza R, Koblizkova A, Widmer A, et al. (2008) Survey of repetitive sequences in *Silene latifolia* with respect to their distribution on sex chromosomes. *Chromosome Res* 16:961–976.
- Kejnovsky E, Hobza R, Cermak T, Kubat Z, Vyskot B (2009) The role of repetitive DNA in structure and evolution of sex chromosomes in plants. *Heredity* 102:533–541.
- Kejnovský E, Michalovova M, Steflava P, Kejnovska I, Manzano S, et al. (2013) Expansion of microsatellites on evolutionary young Y chromosome. *PLoS One* 8:e45519.
- Polley A, Ganai MW, Seigner E (1997) Identification of sex in hop (*Humulus lupulus*) using molecular markers. *Genome* 40: 357–361.
- Karlov GI, Danilova TV, Horlemann C, Weber G (2003) Molecular cytogenetic in hop (*Humulus lupulus* L.) and identification of sex chromosomes by DAPI-banding. *Euphytica* 132:185–190.
- Danilova TV, Karlov GI (2006) Application of inter simple sequence repeat (ISSR) polymorphism for detection of sex-specific molecular markers in hop (*Humulus lupulus* L.). *Euphytica* 151:15–21.
- Grabowska-Joachimiak A, Mosiolek M, Lech A, Goralski G (2011) C-banding/DAPI and *in situ* hybridization reflect karyotype structure and sex chromosome differentiation in *Humulus japonicus* Siebold&Zucc. *Cytogenet Genome Res* 132:203–211.
- Divashuk MG, Alexandrov OS, Kroupin PY, Karlov GI (2011) Molecular cytogenetic mapping of *Humulus lupulus* sex chromosomes. *Cytogenet Genome Res* 134:213–219.
- Aleksandrov OS, Divashuk MG, Karlov GI (2011) Development of a sex-specific molecular marker for Japanese hop *Humulus japonicus* Siebold & Zucc. *Russ J Genet* 47:1016–1020.
- Alexandrov O, Divashuk M, Yakovin N, Karlov G (2012) Sex chromosome differentiation in *Humulus japonicus* Siebold & Zuccarini, 1846 (*Cannabaceae*) revealed by fluorescence *in situ* hybridization of subtelomeric repeat. *Comp Cytogen* 6:239–247.
- Sousa A, Fuchs J, Renner SS (2013) Molecular cytogenetics (FISH, GISH) of *Coccinia grandis*: a ca. 3 myr-old species of *Cucurbitaceae* with the largest Y/autosome divergence in flowering plants. *Cytogenet Genome Res* 139:107–118.
- Filatov DA, Laporte V, Vitte C, Charlesworth D (2001) DNA diversity in sex-linked and autosomal genes of the plant species *Silene latifolia* and *Silene dioica*. *Mol Biol Evol* 18: 1442–1454.
- Bergero R, Forrest A, Kamau E, Charlesworth D (2007) Evolutionary strata on the X chromosomes of the dioecious plant *Silene latifolia*: evidence from new sex-linked genes. *Genetics* 175: 1945–1954.
- Nicolas M, Marais G, Hykelova V, Janousek B, Laporte V, et al. (2005) A gradual process of recombination restriction in the evolutionary history of the sex chromosomes in dioecious plants. *PLoS Biol* 3(1):e4.
- Bergero R, Charlesworth D (2011) Preservation of the Y transcriptome in a 10-million-year-old plant sex chromosome system. *Curr Biol* 21:1470–1474.
- Chibalina MV, Filatov DA (2011) Plant Y chromosome degeneration is retarded by haploid purifying selection. *Curr Biol* 21:1475–1479.
- Muyle A, Zemp N, Deschamps C, Mousset S, Widmer A, et al. (2012) Rapid De Novo Evolution of X Chromosome Dosage Compensation in *Silene latifolia*, a Plant with Young Sex Chromosomes. *PLoS Biol* 10(4): e1001308.
- Yu Q, Hou S, Feltus FA, Jones MR, Murray JE, et al. (2008) Low X/Y divergence in four pairs of papaya sex-linked genes. *The Plant J* 53: 124–132.
- Matsunaga S, Kawano S (2001) Sex determination by sex chromosomes in dioecious plants. *Plant Biol* 3:481–488.
- Shephard HL, Parker JS, Darby P, Ainsworth CC (2000) Sexual development and sex chromosomes in hop. *New Phytol* 148:397–411.
- Sakamoto K, Akiyama Y, Fukui K, Kamada H, Satoh S (1998) Characterization; genome sizes and morphology of sex chromosomes in hemp (*Cannabis sativa* L.). *Cytologia* 63:459–464.
- Kubešová M, Moravcová L, Suda J, Jarošík V, Pyšek P (2010) Naturalized plants have smaller genomes than their non-invading relatives: a flow cytometric analysis of the Czech alien flora. *Preslia* 82:81–96.
- Zonneveld BJM, Leitch IJ, Bennett MD (2005) First nuclear DNA amounts in more than 300 angiosperms. *Ann Bot* 96:229–244.
- Grabowska-Joachimiak A, Sliwińska E, Pigula M, Skomra U, Joachimiak AJ (2006) Genome size in *Humulus lupulus* L. and *H. japonicus* Siebold and Zucc. (*Cannabaceae*). *Acta Soc Bot Pol* 75:207–214.
- Mandolino G, Carboni A, Forapani S, Facci V, Ranalli P (1999) Identification of DNA markers linked to the male sex in dioecious hemp (*Cannabis sativa* L.). *Theor Appl Genet* 98:86–92.
- Törjék O, Bucherna N, Kiss E, Homoki H, Finta-Korpelová Z, et al. (2002) Novel male-specific molecular markers (MADC5, MAD6) in hemp. *Euphytica* 127:209–218.
- Bakel H, Stout J, Cote A, Tallon C, Sharpe A, et al. (2011) The draft genome and transcriptome of *Cannabis sativa*. *Genome Biol* 12:R102.
- Sakamoto K, Abe T, Matsuyama T, Yoshida S, Ohmido N, et al. (2005) RAPD markers encoding retrotransposable elements are linked to the male sex in *Cannabis sativa* L. *Genome* 48:931–936.
- Peil A, Flachowsky H, Schumann E, Weber WE (2003) Sex-linked AFLP markers indicate a pseudoautosomal region in hemp (*Cannabis sativa* L.). *Theor Appl Genet* 107:102–109.
- Sharma AA, Chattopadhyay D (1991) Sex determination in dioecious species of plants. *Feddes Repert* 102:29–55.
- Sakamoto K, Ohmido N, Fukui K, Kamada H, Satoh S (2000) Site-specific accumulation of a LINE-like retrotransposon in a sex chromosome of the dioecious plant *Cannabis sativa*. *Plant Mol Biol* 44:723–732.

## Acknowledgments

The authors thank an unknown reviewer for his or her careful reading, helpful comments and great improvements. We thank Dr Tatyana Sukhorad, P.P. Lukyanenko Krasnodar Research and Development Institute of Agriculture for seeds, and Dr Sergey Dolgov, Branch of M.M. Shemyakin and Yu.A. Ovchinnikov Institute of Bioorganic Chemistry for providing young buds of “T-80” line.

## Author Contributions

Conceived and designed the experiments: MGD OSA GIK. Performed the experiments: MGD OSA IVK. Analyzed the data: MGD OVR. Contributed reagents/materials/analysis tools: MGD. Wrote the paper: GIK OSD MGD.

48. Wang J, Na JK, Yu Q, Gschwend AR, Han J, et al. (2012) Sequencing papaya X and Yh chromosomes reveals molecular basis of incipient sex chromosome evolution. *Proc Nat Acad Science* 109: 13710–13715.
49. Henegariu O, Heerema NA, Lowe Wright L, Bray-Ward P, Ward DC, et al. (2001) Improvements in cytogenetic slide preparation: controlled chromosome spreading, chemical aging and gradual denaturing. *Cytometry* 43:101–109.
50. Kato A, Lamb JC, Birchler JA (2004) Chromosome painting using repetitive DNA sequences as probes for somatic chromosome identification in maize. *Proc Nat Acad Sci USA* 101:13554–13559.
51. Doyle JJ, Doyle JL (1990) Isolation of plant DNA from fresh tissue. *Focus* 12:13–15.
52. Gerlach WL, Bedbrook JR (1979) Cloning and characterization of ribosomal RNA genes from wheat and barley. *Nucleic Acids Res* 7:1869–1885.
53. Campell BR, Song Y, Posch TE, Cullis CA, Town CD (1992) Sequence and organization of 5S ribosomal RNA-encoding genes of *Arabidopsis thaliana*. *Gene* 112:225–228.
54. Levan A, Fredga K, Sandberg A (1964) Nomenclature for centromeric position on chromosomes. *Hereditas* 52:201–220.
55. Kim SY, Lee JK (2008) Karyotype analysis and physical mapping using two rRNA genes in dioecious plant, *Humulus japonicus* Siebold & Zucc. *Gene Genom* 30:157–161.
56. Pillay M, Kenny ST (2006) Structural organization of the nuclear ribosomal RNA genes in *Cannabis* and *Humulus* (Cannabaceae). *Plant Syst Evol* 258:97–105.
57. Spigler RB, Lewers KS, Johnson AL, Ashman TL (2010) Comparative mapping reveals autosomal origin of sex chromosome in octoploid *Fragaria virginiana*. *J Hered* 101:S107–S117.
58. Lahn BT, Page DC (1999) Four evolutionary strata on the human X chromosome. *Science* 286:964–67.
59. Yang MQ, van Velzen R, Bakker FT, Sattarian A, Li DZ, et al. (2013) Molecular phylogenetics and character evolution of Cannabaceae. *Taxon*, 62: 473–485.
60. Murakami A (2000) Comparison of sequence of rbcL and noncoding regions of chloroplast DNA and ITS2 region of rDNA in genus *Humulus*. *Breed Science* 50: 155–160.
61. Murakami A, Darby P, Javornik B, Pais MSS, Seigner E, et al. (2006) Molecular phylogeny of wild hops, *Humulus lupulus* L. *Heredity* 97: 66–74.
62. Zerega NJ, Clement WL, Datwyler SL, Weiblen GD (2005) Biogeography and divergence times in the mulberry family (Moraceae). *Mol Phyl Evol* 37: 402–416.
